# Supplementary material
Source: PubMed Central journal article supplement (PMC2840808)
Supplement: me.2009-0152_1.pdf [file me.2009-0152_1.pdf]

Supplemental Table 1. Liver metabolites with diet-induced changes that occurred only in *Gpat1*<sup>-/-</sup> (KO) mice (Q <0.1).

| Super pathway         | Subpathway                                | Metabolite               | Wildtype          |         |         | KO                |         |         |        |
|-----------------------|-------------------------------------------|--------------------------|-------------------|---------|---------|-------------------|---------|---------|--------|
|                       |                                           |                          | Ratio (Saff/Con)* | P value | Q value | Ratio (Saff/Con)* | P value | Q value |        |
| Amino acid metabolism | Alanine, aspartate metabolism             | beta-alanine             | 1.06              | 0.6072  | 0.5513  | 1.40              | 0.0216  | 0.0933  |        |
|                       | Glutamate metabolism                      | glutamine                | 0.77              | 0.0360  | 0.1119  | 0.58              | 0.0004  | 0.0039  |        |
|                       | Taurine metabolism                        | taurine                  | 1.38              | 0.0405  | 0.1201  | 1.64              | 0.0100  | 0.0575  |        |
|                       | Glutathione metabolism                    | glutathione (GSSG)       | 0.92              | 0.3843  | 0.4550  | 0.76              | 0.0110  | 0.0581  |        |
|                       | Valine, leucine and isoleucine metabolism |                          | N-acetylleucine   | 0.87    | 0.1902  | 0.3188            | 0.61    | 0.0014  | 0.0121 |
|                       |                                           |                          | N-tigloylglycine  | 1.12    | 0.4195  | 0.4708            | 1.46    | 0.0128  | 0.0624 |
| Lipid metabolism      | Glycerolipid metabolism                   | Glycerophosphorylcholine | 0.66              | 0.4515  | 0.4875  | 0.38              | 0.0136  | 0.0627  |        |

\* Safflower oil diet/ control diet

Supplemental Table 2. Plasma metabolites with diet-induced changes that occurred only in *Gpat1*<sup>-/-</sup> (KO) mice (Q <0.1).

| Super pathway         | Subpathway                                    | Metabolites                | Wildtype           |         |         | KO                |         |         |
|-----------------------|-----------------------------------------------|----------------------------|--------------------|---------|---------|-------------------|---------|---------|
|                       |                                               |                            | Ratio (Saff/ Con)* | P value | Q value | Ratio (Saff/Con)* | P value | Q value |
| Amino acid metabolism | Cysteine, methionine, SAM, taurine metabolism | cysteine                   | 0.86               | 0.2803  | 0.2285  | 0.54              | 5.0E-05 | 1.0E-04 |
|                       | Glycine, serine, threonine metabolism         | serine                     | 0.97               | 0.8641  | 0.4606  | 0.59              | 2.0E-04 | 3.0E-04 |
|                       |                                               | threonine                  | 0.99               | 0.9085  | 0.4711  | 0.57              | 3.0E-05 | 1.0E-04 |
|                       | Guanidino and acetamido metabolism            | 1-methylguanidine          | 0.84               | 0.1076  | 0.1279  | 0.67              | 0.0050  | 0.0042  |
|                       | Histidine metabolism                          | histidine                  | 0.85               | 0.1580  | 0.1577  | 0.42              | 2.0E-04 | 3.0E-04 |
|                       |                                               | imidazole lactate          | 1.01               | 0.8065  | 0.4501  | 1.92              | 0.0029  | 0.0028  |
|                       | Lysine metabolism                             | lysine                     | 0.91               | 0.1545  | 0.1562  | 0.42              | 0.0220  | 0.0136  |
|                       | Phenylalanine & tyrosine metabolism           | thyroxine                  | 0.78               | 0.0747  | 0.1030  | 0.63              | 0.0496  | 0.0267  |
|                       |                                               | 3-(4-hydroxyphenyl)lactate | 0.90               | 0.6088  | 0.3820  | 0.55              | 0.0633  | 0.0328  |
|                       | Tryptophan metabolism                         | 3-indoxyl sulfate          | 0.61               | 0.1306  | 0.1217  | 0.57              | 0.0493  | 0.0267  |
|                       | Urea cycle; arginine-, proline-, metabolism   | urea                       | 0.75               | 0.0797  | 0.1065  | 0.53              | 0.0038  | 0.0035  |
|                       |                                               | trans-4-hydroxyproline     | 0.87               | 0.3187  | 0.2438  | 0.47              | 1.0E-05 | 4.0E-05 |
|                       |                                               | citrulline                 | 0.93               | 0.6491  | 0.3967  | 0.59              | 8.0E-04 | 0.0010  |
|                       | Valine, leucine, isoleucine metabolism        | isoleucine                 | 0.89               | 0.2561  | 0.2169  | 0.50              | 3.0E-05 | 1.0E-04 |
|                       |                                               | 3-methyl-2-oxobutyrate     | 0.89               | 0.4894  | 0.3313  | 0.77              | 0.0539  | 0.0286  |
|                       |                                               | 3-methyl-2-oxovalerate     | 0.85               | 0.5218  | 0.3457  | 0.68              | 0.0743  | 0.0362  |
|                       |                                               | leucine                    | 0.97               | 0.7861  | 0.4419  | 0.45              | 2.0E-06 | 1.0E-05 |
|                       |                                               | N-tigloylglycine           | 1.19               | 0.8157  | 0.4504  | 0.32              | 0.0017  | 0.0018  |

|                         |                                                      |                             |      |         |        |      |         |         |
|-------------------------|------------------------------------------------------|-----------------------------|------|---------|--------|------|---------|---------|
| Carbohydrate metabolism | Mannose metabolism                                   | mannose                     | 1.04 | 0.7563  | 0.4310 | 0.66 | 0.0036  | 0.0034  |
|                         | Glycolysis, gluconeogenesis, pyruvate metabolism     | glucose                     | 0.90 | 0.3074  | 0.2406 | 0.76 | 0.0036  | 0.0034  |
|                         |                                                      | lactate                     | 0.73 | 0.4058  | 0.2872 | 0.33 | 4.0E-05 | 1.0E-04 |
|                         | Nucleotide sugars, pentose metabolism                | ribitol (adonitol)          | 1.39 | 0.14444 | 0.1514 | 0.57 | 0.0143  | 0.0096  |
|                         |                                                      | gluconate                   | 0.96 | 0.8311  | 0.4567 | 0.69 | 0.0355  | 0.0200  |
| Cofactors and vitamins  | Ascorbate, aldarate metabolism                       | threonate                   | 0.89 | 0.2496  | 0.2149 | 0.54 | 0.0051  | 0.0042  |
|                         |                                                      | glucarate (saccharate)      | 1.05 | 0.6497  | 0.3967 | 0.52 | 0.0046  | 0.0040  |
| Energy production       | Oxidative phosphorylation                            | phosphate                   | 0.86 | 0.0807  | 0.1065 | 0.70 | 5.0E-04 | 7.0E-04 |
| Lipid metabolism        | Glycerolipid metabolism                              | glycerophosphorylcholine    | 1.85 | 0.0806  | 0.1065 | 2.14 | 0.0133  | 0.0091  |
|                         |                                                      | choline                     | 0.76 | 0.1161  | 0.1329 | 0.56 | 0.0014  | 0.0016  |
|                         |                                                      | glycerol 3-phosphate        | 1.18 | 0.3716  | 0.2691 | 0.77 | 0.0724  | 0.0359  |
| Nucleotide metabolism   | Purine metabolism, (hypo)xanthine/inosine containing | hypoxanthine                | 0.94 | 0.8525  | 0.4606 | 1.57 | 0.0670  | 0.0340  |
|                         | Purine metabolism, urate metabolism                  | allantoin                   | 0.83 | 0.1735  | 0.1668 | 0.65 | 0.0072  | 0.0056  |
| Peptide metabolism      | $\gamma$ -Glutamyl                                   | $\gamma$ -glutamylglutamine | 0.95 | 0.9762  | 0.4935 | 0.65 | 0.0748  | 0.0362  |
| Xenobiotics             | Chemical                                             | glycolate (hydroxyacetate)  | 0.90 | 0.3517  | 0.2620 | 0.62 | 5.0E-04 | 7.0E-04 |
|                         | Sugar, sugar substitute, starch                      | erythritol                  | 1.09 | 0.9674  | 0.4906 | 0.60 | 0.0091  | 0.0068  |

\* Safflower oil diet/ control diet
